# Supplementary material for: Preparation of cellulose nanofibers coated with poly(vinyl alcohol) crystals and their application in composite films
Source: Royal Society of Chemistry journal article supplement (doi:10.1039/c7ra01062a), 2017-01-01
Supplement: c7ra01062a1.pdf [file c7ra01062a1.pdf]

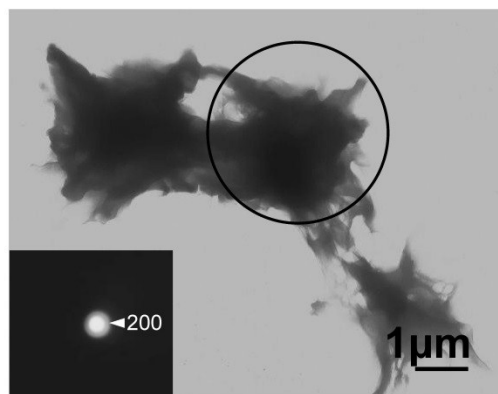

Fig.S1 Transmission electron micrograph and selected area electron diffraction pattern of NCF<sub>(CeNF/PVA=1/50)</sub>.

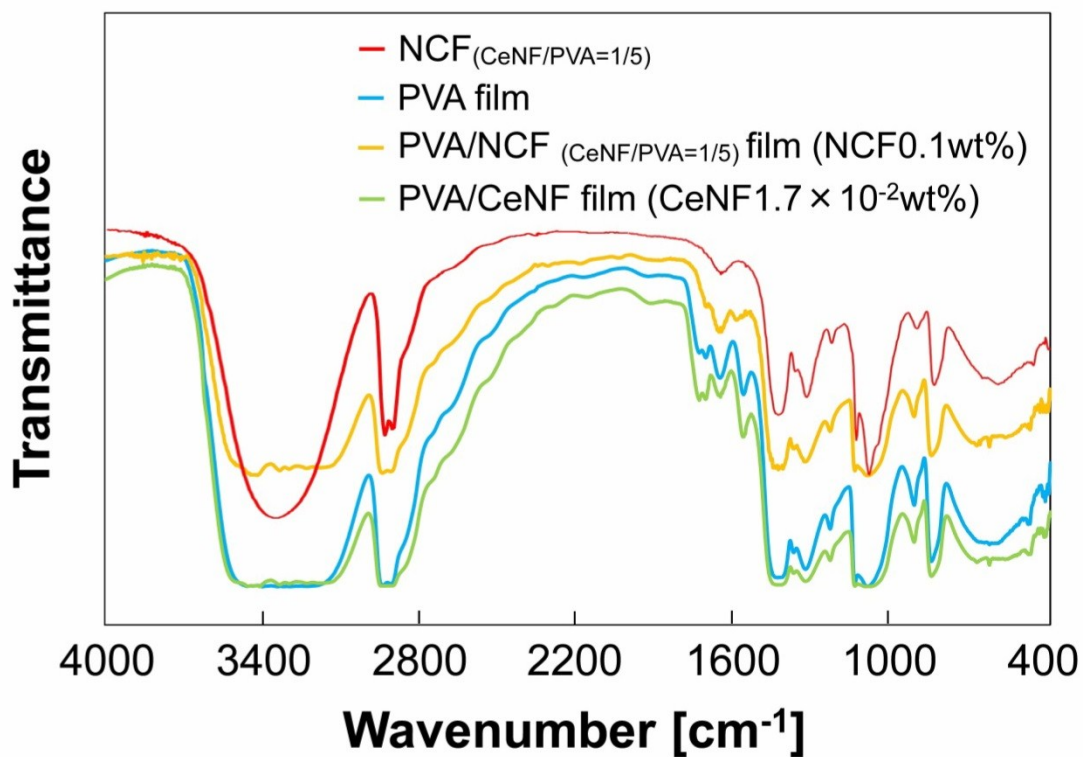

Fig.S2 FTIR spectra of NCF film, PVA film, NCF/PVA composite film and CeNF/PVA composite film.
